# Supplementary material for: Canadian Organ Replacement Register (CORR): reflecting the past and embracing the future
Source: PubMed Central journal article supplement (PMC4349772; doi:10.1186/s40697-014-0026-5), 2014-10-11
Supplement: 40697_2014_26_MOESM1_ESM.pdf [file 40697_2014_26_MOESM1_ESM.pdf]

# Form 1: Initial Registration form

Hospital Name: \_\_\_\_\_

**SEND THIS CONFIDENTIAL INFORMATION TO:**  
 Canadian Organ Replacement Register (CORR)  
 Canadian Institute for Health Information  
 4110 Yonge Street, Suite 300  
 Toronto, ON M2P 2B7  
 Tel: 416-481-2002

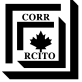

Hospital City: \_\_\_\_\_

Hospital Number: \_\_\_\_\_

## SECTION A—PERSONAL IDENTIFICATION

*(Patient label may be attached if same information is provided.)*

Patient Last Name: \_\_\_\_\_

Patient Former Name: \_\_\_\_\_

Patient First and Middle Names: \_\_\_\_\_

Patient Address (city and province only): \_\_\_\_\_

Patient Postal Code: \_\_\_\_\_

Health Card Number: \_\_\_\_\_

Province of Health Card: \_\_\_\_\_

Date of Birth: \_\_\_\_\_ (DD/MON/YYYY)

Sex (check one):  Male  Female  Other

Race (check one):  Caucasian/white (01)  Asian (02)

Black (03)  Indian Sub-continent (05)  Pacific Islander (08)

Aboriginal (09)  Mid-East/Arabian (10)  Latin American (11)

Unknown (98) \_\_\_\_\_  Other/Multiracial (99) \_\_\_\_\_

## SECTION B—PRE-DIALYSIS AND INITIAL BLOOD WORK

Date when patient first seen by nephrologist:

\_\_\_\_\_ (DD/MON/YYYY)

**Was patient followed by a nephrologist prior to initiating dialysis?**

(check one):  no pre-dialysis follow-up (0)

yes followed in nephrologist's office (1)

yes followed in speciality clinic (2)

yes followed in both office and clinic (3)

unknown (9)

Was the patient receiving erythropoietin (i.e. Eprex, Aranesp) prior to initial dialysis treatment?

no  yes  unknown

If yes:

Eprex  Aranesp  Other

Last blood work before initial dialysis treatment: *(Indicate NA if not available)*

Haemoglobin (g/L) \_\_\_\_\_ Creatinine (µmol/L) \_\_\_\_\_

Urea (mmol/L) \_\_\_\_\_ Serum Bicarbonate/CO<sub>2</sub> (mmol/L) \_\_\_\_\_

Serum Calcium (mmol/L) \_\_\_\_\_  uncorrected  corrected  ionized

Serum Phosphate (mmol/L) \_\_\_\_\_ Serum Albumin (g/L) \_\_\_\_\_

Serum Parathormone (PTH) \_\_\_\_\_  pmol/L  ng/L  pg/ml

*Affix patient label, if available.*

## SECTION C—INITIAL AND INTENDED DIALYSIS TREATMENT

Access used at time of initial dialysis (check one):

**Haemodialysis**  Temporary catheter non-cuffed (1)

Temporary catheter cuffed (2)  Permanent catheter non-cuffed (3)

Permanent catheter cuffed (4)  AV fistula (5)  AV graft (6)

**Peritoneal Dialysis**  PD catheter (7)

**Date of first renal replacement therapy:**

\_\_\_\_\_ (DD/MON/YYYY)

Initial dialysis treatment type *(Specify location, type and level of assistance/care.)*

**LOCATION:**

Acute care hospital  Chronic care hospital  Community centre  Home

**TYPE:**

Conventional haemo  Short daily haemo  Slow nocturnal haemo

CAPD  APD  Peritoneal dialysis combined with haemo

**ASSISTANCE/CARE:**

Total care  Limited self care  Total self care

Is this initial treatment the intended long-term dialysis treatment for this patient?

Unknown

Yes

No ( If not, why not?

no facilities/space available (1)

no mature access (2)

unforeseen change in patient status leading to sudden dialysis start (3)

other (specify) \_\_\_\_\_ (4)

If not, what is the long-term intended treatment for this patient?  
*(Specify location, type and level of assistance/care.)*

**LOCATION:**

Acute care hospital  Chronic care hospital  Community centre  Home

**TYPE:**

Conventional haemo  Short daily haemo  Slow nocturnal haemo

CAPD  APD  Peritoneal dialysis combined with haemo

**ASSISTANCE/CARE**

Total care  Limited self care  Total self care

Patient Last Name: \_\_\_\_\_

**SECTION D—HEIGHT AND WEIGHT**

Height/weight cannot be provided because patient is:

- A double-leg amputee

Record patient's height (cm) at the start of the first dialysis treatment this year:

\_\_\_\_\_|\_\_\_\_\_|\_\_\_\_\_|\_\_\_\_\_|\_\_\_\_\_| cm

Record patient's actual weight (kg) within the first month of treatment:

\_\_\_\_\_|\_\_\_\_\_|\_\_\_\_\_|\_\_\_\_\_|\_\_\_\_\_| kg

Conversion factors: 1 inch = 2.54 cm; 1 lb = 0.454 kg

**SECTION E—PRIMARY DIAGNOSIS AND RISK FACTOR HISTORY**

Primary renal disease (see codes on page 3): \_\_\_\_\_

Specify: \_\_\_\_\_

**Risk Factors/Co-morbid Conditions (check one response per condition):**

|                                                                                                                                                                                                                                          | No                       | Yes                      | Unknown                  |
|------------------------------------------------------------------------------------------------------------------------------------------------------------------------------------------------------------------------------------------|--------------------------|--------------------------|--------------------------|
| a) Angina                                                                                                                                                                                                                                | <input type="checkbox"/> | <input type="checkbox"/> | <input type="checkbox"/> |
| b) Myocardial infarct                                                                                                                                                                                                                    | <input type="checkbox"/> | <input type="checkbox"/> | <input type="checkbox"/> |
| c) Coronary artery bypass grafts/angioplasty                                                                                                                                                                                             | <input type="checkbox"/> | <input type="checkbox"/> | <input type="checkbox"/> |
| d) Recent history of pulmonary edema<br>(i.e. episode(s) of congestive heart failure or pulmonary edema within 6 months prior to dialysis)                                                                                               | <input type="checkbox"/> | <input type="checkbox"/> | <input type="checkbox"/> |
| e) Cerebrovascular disease<br>(i.e. stroke, transient ischemic attack, carotid surgery)                                                                                                                                                  | <input type="checkbox"/> | <input type="checkbox"/> | <input type="checkbox"/> |
| f) Peripheral vascular disease<br>(i.e. previous surgery such as femoropopliteal bypass graft, iliac or femoral endarterectomy, angioplasty, etc.; ischemic muscle pain precipitated by exercise; ischemic ulcers; gangrene; amputation) | <input type="checkbox"/> | <input type="checkbox"/> | <input type="checkbox"/> |
| g) Diabetes Type 1                                                                                                                                                                                                                       | <input type="checkbox"/> | <input type="checkbox"/> | <input type="checkbox"/> |
| h) Diabetes Type 2                                                                                                                                                                                                                       | <input type="checkbox"/> | <input type="checkbox"/> | <input type="checkbox"/> |
| i) Malignancy existing prior to first treatment                                                                                                                                                                                          | <input type="checkbox"/> | <input type="checkbox"/> | <input type="checkbox"/> |

If yes, indicate site using the codes listed on page 3 or specify:

\_\_\_\_\_|\_\_\_\_\_|\_\_\_\_\_

|                                                                                  |                          |                          |                          |
|----------------------------------------------------------------------------------|--------------------------|--------------------------|--------------------------|
| j) Chronic obstructive lung disease<br>(i.e. emphysema or chronic bronchitis)    | <input type="checkbox"/> | <input type="checkbox"/> | <input type="checkbox"/> |
| k) Receiving medication for hypertension                                         | <input type="checkbox"/> | <input type="checkbox"/> | <input type="checkbox"/> |
| l) Other serious illness that could shorten life expectancy to less than 5 years | <input type="checkbox"/> | <input type="checkbox"/> | <input type="checkbox"/> |

If yes, specify condition: \_\_\_\_\_

|                                                                                              |                          |                          |                          |
|----------------------------------------------------------------------------------------------|--------------------------|--------------------------|--------------------------|
| m) Current smoker<br>(i.e. has smoked cigarettes, cigars or a pipe in the last three months) | <input type="checkbox"/> | <input type="checkbox"/> | <input type="checkbox"/> |
|----------------------------------------------------------------------------------------------|--------------------------|--------------------------|--------------------------|

**Treatment Codes**

Consists of treatment location, treatment type and level of assistance/care required.

**LOCATION**

**1 = Acute Care Hospital:** Treatments carried out in a dialysis facility located in or on the grounds of a hospital that provides full renal care services (i.e. services provided under the care of nephrologist(s), which include social work and dietary consultation and inpatient back-up care).

**2 = Chronic Care Hospital:** Treatments carried out in a facility where ongoing medical intervention is provided and residents require assistance. Includes chronic care facilities and nursing homes.

**3 = Community Centre:** Dialysis done outside a hospital. Treatment may occur in an office building, shopping plaza or other place where nephrology inpatient services are not onsite. This includes mobile dialysis services, and dialysis provided at independent health facilities.

**4 = Home:** Treatments carried out in the patient's home by the patient and/or family member(s).

**TYPE**

**1 = Conventional Haemodialysis:** Given 3–6 hours two to four times a week.

**2 = Short Daily Haemodialysis:** Given during the day or evening for 2–3 hours 5 to 7 days per week.

**3 = Slow Nocturnal Haemodialysis:** Given 5–6 nights per week.

**4 = CAPD (Continuous Ambulatory Peritoneal Dialysis):** Patient receives peritoneal dialysis treatments through an implanted peritoneal catheter continuously throughout the day and night. The fluid held in the abdominal cavity is exchanged an average of 4 times per 24 hours, with a usual volume of 2 litres (includes enhanced CAPD).

**5 = APD (Automated Peritoneal Dialysis):** An automated cyclor is used to effect the dialysate exchanges while the patient sleeps at night with or without additional exchanges during the day. Excludes night manual exchanges and non-automated night exchanges.

**6 = Peritoneal Dialysis Combined with Haemodialysis:** Patient is receiving a combination of any type of peritoneal dialysis and haemodialysis.

For Type of Treatment code 6 only, location and level of assistance are to be coded as 0 (i.e. 0-6-0).

**ASSISTANCE/CARE REQUIRED**

**1 = Total Care:** Patient is under the full care of trained staff affiliated with a nephrology unit.

**2 = Limited Self Care:** Patient receives a minimal amount of assistance from trained staff affiliated with a nephrology unit. This does not include family member(s).

**3 = Total Self Care:** Patient is completely responsible for his/her own treatment, with no assistance from nephrology trained staff. A patient may be classified as total self care if he/she receives assistance from family member(s) or home care worker who is not a trained staff affiliated with a nephrology unit.

**Examples:**

An elderly, infirmed patient waiting for a chronic care bed but being treated at an acute care hospital with conventional haemodialysis would be coded: 11111.

A patient on short daily haemodialysis who is being treated at the acute care hospital with only some care provided by trained staff would be coded: 11222.

A patient on home CAPD receiving no assistance from trained staff would be coded: 4443.

**Site of Primary Malignancy Codes**

11 Two or more primary malignancies

**SKIN** (excludes lips and genitals)

20 Squamous cell carcinoma  
 21 Basal cell carcinoma  
 22 Squamous and basal cell carcinoma  
 23 Malignant melanoma

**LEUKAEMIAS AND RETICULOSES**

25 Myeloma  
 26 Acute leukaemia  
 27 Chronic leukaemia  
 29 Reticulum cell sarcoma  
 30 Kaposi sarcoma  
 31 Lymphosarcoma  
 33 Plasma cell lymphoma  
 34 Hodgkin's disease  
 35 Lymphoreticular tumours  
 36 Histiocytic reticulosis

**GASTRO-INTESTINAL TRACT**

40 Lip  
 41 Tongue  
 42 Parotid  
 43 Oesophagus  
 44 Stomach  
 45 Colon  
 46 Rectum  
 47 Anus  
 48 Liver—primary hepatoma  
 49 Liver—primary lymphoma  
 50 Gallbladder and bile duct  
 51 Pancreas

**NECK AND THROAT**

53 Larynx  
 54 Thyroid  
 55 Bronchus  
 56 Lung, primary tumour

**UROGENITAL TRACT**

60 Kidney—Wilms' tumour  
 61 Kidney—Hypernephroma of host kidney  
 62 Kidney—Hypernephroma of graft kidney  
 63 Renal pelvis  
 64 Ureter  
 65 Urinary bladder  
 66 Urethra  
 67 Prostate  
 68 Testis  
 69 Penis  
 70 Scrotum  
 71 Perineum  
 72 Vulva  
 73 Vagina  
 74 Uterus—cervix  
 75 Uterus—body  
 76 Ovary

**MISCELLANEOUS**

80 Breast  
 81 Muscle  
 82 Bone  
 83 Brain—primary lymphoma  
 84 Brain—other primary tumour  
 85 Other tumour of central nervous system  
 90 Metastatic carcinoma, primary site unknown  
 99 Other primary tumour, specify \_\_\_\_\_

**Primary Renal Diagnosis Codes**

00 Chronic renal failure—aetiology uncertain

**GLOMERULONEPHRITIS/  
AUTOIMMUNE DISEASES**

05 Mesangial proliferative glomerulonephritis  
 06 Minimal lesion glomerulonephritis  
 07 Post-strep glomerulonephritis  
 08 Rapidly progressive glomerulonephritis  
 09 Focal glomerulonephritis (adults)  
 10 Glomerulonephritis, histologically NOT examined  
 11 Severe nephrotic syndrome with focal sclerosis (paediatric patients)  
 12 IgA nephropathy—proven by immunofluorescence (not code 85)  
 13 Dense deposit disease—proven by immunofluorescence and/or electron microscopy (MPGN Type II)  
 14 Membranous nephropathy  
 15 Membranoproliferative mesangiocapillary glomerulonephritis (MPGN Type I)  
 16 Idiopathic crescentic glomerulonephritis (diffuse proliferative)  
 17 Congenital nephrosis or congenital nephrotic syndrome  
 19 Glomerulonephritis, histologically examined—specify \_\_\_\_\_  
 73 Polyarteritis  
 74 Wegener's granulomatosis

84 Lupus erythematosus  
 85 Henoch-Schonlein purpura  
 86 Goodpasture's syndrome  
 87 Scleroderma  
 88 Haemolytic uraemic syndrome

**NEPHROPATHY, DRUG-INDUCED**

30 Nephropathy caused by drugs or nephrotoxic agents—cause not specified  
 31 Nephropathy due to analgesic drugs  
 32 Nephropathy due to cisplatin  
 33 Nephropathy due to Cyclosporin A  
 39 Nephropathy caused by other specific drugs—specify \_\_\_\_\_

**POLYCYSTIC KIDNEY**

41 Polycystic kidneys, adult type (dominant)  
 42 Polycystic kidneys, infantile and juvenile types (recessive)

**DIABETES**

80 Diabetic nephropathy associated with Type 1  
 81 Diabetic nephropathy associated with Type 2

**CONGENITAL/HEREDITARY  
RENAL DISEASES**

21 Pyelonephritis/Interstitial nephritis associated with neurogenic bladder  
 22 Pyelonephritis/Interstitial nephritis due to congenital obstructive uropathy with or without vesico-ureteric reflux  
 24 Pyelonephritis/Interstitial nephritis due to vesico-ureteric reflux without obstruction  
 40 Cystic kidney disease, type unspecified

41 Polycystic kidneys, adult type (dominant)  
 42 Polycystic kidneys, infantile and juvenile types (recessive)  
 43 Medullary cystic disease, including nephronophthisis  
 49 Cystic kidney disease, other type—specify \_\_\_\_\_

50 Hereditary/familial nephropathy, type unspecified  
 51 Hereditary nephritis with nerve deafness (Alport's Syndrome)  
 52 Cystinosis  
 53 Oxalosis  
 54 Fabry's disease  
 55 DRASH syndrome  
 58 Posterior urethral valves  
 59 Hereditary nephropathy, other—specify \_\_\_\_\_

60 Congenital renal hypoplasia, specify \_\_\_\_\_  
 61 Oligomegonephronic hypoplasia  
 62 Segmental renal hypoplasia (Ask-Upmark kidney)  
 63 Congenital renal dysplasia with or without urinary tract malformation  
 66 Syndrome of agenesis of abdominal muscles (Prune belly syndrome)

**RENAL VASCULAR DISEASE**

70 Renal vascular disease, type unspecified  
 71 Malignant hypertension (no primary renal disease)  
 72 Renal vascular disease due to hypertension (no primary renal disease)  
 73 Polyarteritis nodosa  
 78 Atheroembolic renal disease  
 79 Renal vascular disease, classified (nephrosclerosis, renal vascular thrombosis)

**OTHER**

20 Pyelonephritis/Interstitial nephritis, cause not specified  
 23 Pyelonephritis/Interstitial nephritis, due to acquired obstructive uropathy—specify \_\_\_\_\_  
 25 Pyelonephritis/Interstitial nephritis, due to urolithiasis  
 29 Pyelonephritis, other causes  
 56 Sickle cell nephropathy  
 57 Wilms' tumour  
 82 Multiple myeloma  
 83 Amyloid  
 89 Multi-system disease, other—specify \_\_\_\_\_  
 90 Cortical or acute tubular necrosis  
 91 Tuberculosis  
 92 Gout  
 93 Nephrocalcinosis and hypercalcaemic nephropathy  
 94 Balkan nephropathy  
 95 Kidney tumour  
 96 Traumatic or surgical loss of kidney  
 97 HIV nephropathy  
 99 Other identified renal disorder—specify \_\_\_\_\_

**SEND THIS CONFIDENTIAL INFORMATION TO:**  
 Canadian Organ Replacement Register (CORR)  
 Canadian Institute for Health Information  
 4110 Yonge Street, Suite 300  
 Toronto, ON M2P 2B7  
 Tel.: 416-481-2002

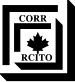

# Form 2: Change of Status form

Hospital name: \_\_\_\_\_

Hospital city: \_\_\_\_\_

## SECTION A—PERSONAL IDENTIFICATION

Hospital number: \_\_\_\_\_

*(Patient label may be attached if same information is provided.)*

Patient last name: \_\_\_\_\_

Patient first and middle names: \_\_\_\_\_

Health card number: \_\_\_\_\_

Prov. or terr. of health card: \_\_\_\_\_

Date of birth: \_\_\_\_/\_\_\_\_/\_\_\_\_ (DD/MON/YYYY)

*Affix patient label, if available.*

## SECTION B—TREATMENT AND CHANGES

*Record treatment changes for this patient during the calendar year, including transfers. When applicable, circle appropriate transfer, withdrew and died codes in column one. Please enter name and city of hospital for each transfer-in and transfer-out. All treatment/transfer change codes are listed below and are defined on the reverse. Treatment location, type and level of assistance/care must be specified when there is a treatment change.*

|               | Treatment Location Type Care<br><i>(Circle code.) (See codes below.)</i> | DD                    | MON   | YYYY  | Hospital Name | Hospital City | Major Reason for Change<br><i>(See codes below.)</i><br><i>Specify, if other.</i> |
|---------------|--------------------------------------------------------------------------|-----------------------|-------|-------|---------------|---------------|-----------------------------------------------------------------------------------|
| 1st treatment | _ _ _ _                                                                  | _ _ / _ _ _ / _ _ _ _ | _____ | _____ | _____         | _____         |                                                                                   |
| 1st change    | T R<br>W D  _ _ _ _                                                      | _ _ / _ _ _ / _ _ _ _ | _____ | _____ | _____         | _ _ _         |                                                                                   |
| 2nd change    | T R<br>W D  _ _ _ _                                                      | _ _ / _ _ _ / _ _ _ _ | _____ | _____ | _____         | _ _ _         |                                                                                   |
| 3rd change    | T R<br>W D  _ _ _ _                                                      | _ _ / _ _ _ / _ _ _ _ | _____ | _____ | _____         | _ _ _         |                                                                                   |
| 4th change    | T R<br>W D  _ _ _ _                                                      | _ _ / _ _ _ / _ _ _ _ | _____ | _____ | _____         | _ _ _         |                                                                                   |
| 5th change    | T R<br>W D  _ _ _ _                                                      | _ _ / _ _ _ / _ _ _ _ | _____ | _____ | _____         | _ _ _         |                                                                                   |

If transplant, specify organ(s): \_\_\_\_\_

**Transfer/Withdrew/Died Change Codes** *(See reverse for definitions).*  
 T Transfer in R Transfer out  
 W Withdrew from treatment *(Complete Sections D or C, where applicable.)* D Died *(Complete Sections C or D, where applicable.)*

**Treatment Codes** *(See reverse for definition).*  
*Consists of treatment location, treatment type and level of assistance/care required.*

| LOCATION                | TYPE                                                        | ASSISTANCE/CARE     |
|-------------------------|-------------------------------------------------------------|---------------------|
| 1 Acute care hospital   | 1 Conventional hemodialysis                                 | 1 Total care        |
| 2 Chronic care hospital | 2 Short daily hemodialysis                                  | 2 Limited self care |
| 3 Community centre      | 3 Slow nocturnal hemodialysis                               | 3 Total self care   |
| 4 Home                  | 4 Continuous ambulatory peritoneal dialysis (CAPD)          |                     |
|                         | 5 Automated peritoneal dialysis (APD)                       |                     |
|                         | 6 Peritoneal dialysis combined with hemodialysis (code 060) |                     |
|                         | 7 Transplantation (code 171)                                |                     |

**Examples:**  
*An elderly, infirm patient waiting for a chronic care bed but being treated at an acute care hospital with conventional hemodialysis would be coded |1|1|1.*  
*A patient on short daily hemodialysis, who is being treated at the acute care hospital with only some care provided by trained staff, would be coded |1|2|2.*  
*A patient on home CAPD receiving no assistance from trained staff would be coded |4|4|3.*

## Major Reason for Treatment Change Codes

| HD Specific                          | Other                                                                                     |
|--------------------------------------|-------------------------------------------------------------------------------------------|
| 15 Hemodialysis access failure       | 03 Inadequate dialysis                                                                    |
| 17 Cardiovascular instability        | 08 Transferred to originally intended treatment                                           |
| <b>PD Specific</b>                   | 14 Patient/family unable to cope with current treatment (patient/family initiated change) |
| 01 Peritonitis                       | 18 Resource/geographical (non-medical)                                                    |
| 02 Other abdominal complications     | 09 Transplanted                                                                           |
| 16 Other complications related to PD | 10 Recovered function                                                                     |
|                                      | 19 Failed transplant                                                                      |
|                                      | 11 Lost to follow-up                                                                      |
|                                      | 20 Left country                                                                           |
|                                      | 99 Other, specify _____                                                                   |

## SECTION C—CAUSE OF DEATH

If patient died, enter the cause of death. *(See reverse for codes.)* |\_|\_|\_|

Specify, if other: \_\_\_\_\_

Date of death: \_\_\_\_/\_\_\_\_/\_\_\_\_ (DD/MON/YYYY)

## SECTION D—REASON FOR WITHDRAWAL

*If this patient has withdrawn from renal replacement therapy (even if he/she has died), please check the major reason for withdrawal:*

Psychosocial (1)  Vascular (stroke, peripheral vascular disease, etc.) (2)

Heart disease (3)  Infection (4)

Cancer (5)  Dementia (6)

Other (specify) \_\_\_\_\_ (7)

Palliative care (8)

Unknown (9)

## Treatment Codes

Consists of treatment location, treatment type and level of assistance/care required.

### LOCATION

**1 = Acute care hospital:** Treatments carried out in a dialysis facility located in or on the grounds of a hospital that provides full renal care services (i.e. services provided under the care of nephrologists, including social work, dietary consultation and inpatient back-up care).

**2 = Chronic care hospital:** Treatments carried out in a facility where ongoing medical intervention is provided and residents require assistance. Includes chronic care facilities and nursing homes.

**3 = Community centre:** Dialysis done outside a hospital. Treatment may occur in an office building, shopping plaza or other place where nephrology inpatient services are not onsite. This includes mobile dialysis services and dialysis provided at independent health facilities.

**4 = Home:** Treatments carried out in the patient's home by the patient and/or family member(s).

### TYPE

**1 = Conventional hemodialysis:** Given 3 to 6 hours 2 to 4 times a week.

**2 = Short daily hemodialysis:** Given during the day or evening for 2 to 3 hours 5 to 7 days per week.

**3 = Slow nocturnal hemodialysis:** Given 5 to 6 nights per week.

**4 = CAPD (continuous ambulatory peritoneal dialysis):** Patient receives peritoneal dialysis treatments through an implanted peritoneal catheter continuously throughout the day and night. The fluid held in the abdominal cavity is exchanged an average of 4 times per 24 hours, with a usual volume of 2 litres (includes enhanced CAPD).

**5 = APD (automated peritoneal dialysis):** An automatedycler is used to affect the dialysate exchanges while the patient sleeps at night with or without additional exchanges during the day. Excludes night manual exchanges and non-automated night exchanges.

**6 = Peritoneal dialysis combined with hemodialysis:** Patient is receiving a combination of any type of peritoneal dialysis and hemodialysis (code 060).

**7 = Transplantation (code 171).**

### ASSISTANCE/CARE REQUIRED

**1 = Total care:** Patient is under the full care of trained staff affiliated with a nephrology unit.

**2 = Limited self care:** Patient receives a minimal amount of assistance from trained staff affiliated with a nephrology unit.

**3 = Total self care:** Patient is completely responsible for his/her own treatment, with no assistance from trained nephrology staff. A patient may be classified as total self care if he/she receives assistance from family members or a home care worker who is not a trained staff member affiliated with a nephrology unit.

## Cause of Death Codes

### GENERIC

00 Cause of death uncertain, not determined

### ACCIDENT

81 Accident related to treatment  
82 Accident unrelated to treatment

### CARDIAC

11 Myocardial ischemia and infarction  
12 Hyperkalemia  
13 Hemorrhagic pericarditis  
14 Other causes of cardiac failure  
15 Cardiac arrest, cause unknown  
16 Hypertensive cardiac failure  
17 Hypokalemia  
18 Fluid overload

### GASTROINTESTINAL

02 Gastrointestinal tumour with or without perforation  
20 Acute gastroenteritis with dehydration  
23 Gastrointestinal hemorrhage  
29 Mesenteric infarction  
62 Pancreatitis  
68 Perforation of peptic ulcer  
70 Sclerosing (or adhesive) peritoneal disease  
72 Perforation of colon/small bowel

### HEMATOLOGIC

63 Bone marrow depression  
71 Thrombocytopenia  
73 Thrombosis—specify \_\_\_\_\_

### INFECTION

03 Infection (bacterial)—specify site \_\_\_\_\_  
04 Infection (viral)—specify site \_\_\_\_\_  
05 Infection (fungal)—specify site \_\_\_\_\_  
06 Cytomegalovirus  
07 Epstein-Barr virus  
08 Pneumocystis carinii pneumonia (PCP)  
09 Protozoal/parasitic infection (includes toxoplasmosis)  
10 Wound infection—specify site \_\_\_\_\_  
34 Infections elsewhere (except viral hepatitis codes 41 and 42)  
35 Septicemia/sepsis—specify source \_\_\_\_\_  
36 Tuberculosis (lung)  
37 Tuberculosis (elsewhere)  
38 Generalized viral infection—specify viral agent \_\_\_\_\_  
39 Peritonitis (not code 70)

### LIVER

41 Liver, due to hepatitis B virus  
42 Liver, due to other viral hepatitis  
43 Liver, drug toxicity—specify drug \_\_\_\_\_  
44 Cirrhosis, not viral  
45 Cystic liver disease  
46 Liver failure, cause unknown  
74 Liver, due to hepatitis C virus

### METABOLIC

59 Drug-related toxicity—specify drug \_\_\_\_\_

### NEUROLOGIC

75 Drug neurotoxicity—specify drug \_\_\_\_\_  
76 Status epilepticus  
77 Neurologic infection—specify infectious agent \_\_\_\_\_

### RENAL DISEASE

61 Uremia caused by kidney transplant failure

### RESPIRATORY

19 Acute respiratory distress syndrome (ARDS)  
31 Pulmonary infection (bacterial)  
32 Pulmonary infection (viral)  
33 Pulmonary infection (fungal)  
49 Bronchiolitis obliterans

### SOCIAL

50 Drug abuse (excludes alcohol abuse)  
51 Patient refused further treatment  
52 Suicide  
53 Therapy ceased for any other reason  
54 Alcohol abuse

### VASCULAR

21 Pulmonary embolus  
22 Cerebrovascular accident  
24 Hemorrhage from graft site—specify \_\_\_\_\_  
25 Hemorrhage from vascular access or dialysis circuit  
26 Ruptured vascular aneurysm (not codes 22 or 25)  
27 Hemorrhage from surgery (not codes 23, 24 or 26)—specify \_\_\_\_\_  
28 Other hemorrhage (not codes 23 to 27)  
55 Vascular thrombosis  
56 Pulmonary vein stenosis  
57 Stent/balloon complication

### MISCELLANEOUS

30 Hypertension  
40 Diabetic keto acidosis (DKA)  
64 Cachexia  
66 Malignant disease possibly induced by immunosuppressive therapy—specify primary site \_\_\_\_\_  
67 Malignant disease (not code 66)—specify primary source \_\_\_\_\_  
69 Dementia  
90 Multi-system failure  
99 Other identified cause of death—specify \_\_\_\_\_

**SEND THIS CONFIDENTIAL INFORMATION TO:**

Canadian Organ Replacement Register (CORR)  
 Canadian Institute for Health Information  
 4110 Yonge Street, Suite 300  
 Toronto, Ontario M2P 2B7  
 Phone: 416-481-2002

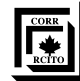

### Form 3: Follow-up Hemodialysis form

Please complete one follow-up form for every living hemodialysis patient being treated at your centre on October 31, 2014.

(Patient label may be attached if same information is provided.)

Hospital Name: \_\_\_\_\_

Patient Last Name: \_\_\_\_\_

Patient First and Middle Names: \_\_\_\_\_

Current Health Card Number: \_\_\_\_\_

Province of Health Card: \_\_\_\_\_

Current Postal Code: |\_|\_|\_|\_| |\_|\_|\_|\_|

Date of Birth: |\_|\_|/|\_|\_|/|\_|\_|\_|\_| (DD/MON/YYYY)

Hospital City: \_\_\_\_\_

Hospital Number: \_\_\_\_\_

*Affix patient label, if available.*

1. Provide the details on the latest available laboratory results for this patient. Date cannot exceed December 31, 2014.

| Test                                                                                                                                                   | Reference Range*                                                                                                                                                                                                  | Laboratory Results                                                     | Date of Test (MON/YYYY)                  | Test Not Done            |
|--------------------------------------------------------------------------------------------------------------------------------------------------------|-------------------------------------------------------------------------------------------------------------------------------------------------------------------------------------------------------------------|------------------------------------------------------------------------|------------------------------------------|--------------------------|
| Hemoglobin (g/L) (pre-dialysis)                                                                                                                        | 60–140 g/L                                                                                                                                                                                                        | _____ g/L                                                              | _ _ _ / _ _ _ _                          | <input type="checkbox"/> |
| Ferritin (within nearest six months) (pmol/L or µg/L)                                                                                                  | 50–500 pmol/L<br>Males 14–610 µg/L<br>Females 8–125 µg/L                                                                                                                                                          | _____<br><input type="checkbox"/> pmol/L <input type="checkbox"/> µg/L | _ _ _ / _ _ _ _                          | <input type="checkbox"/> |
| Iron profile (for example, % saturation, serum iron, transferrin, TIBC)                                                                                | <input type="checkbox"/> Iron saturation (25%–50%)<br><input type="checkbox"/> Serum iron (9–32 µmol/L) and TIBC (45–81 µmol/L)<br><input type="checkbox"/> Serum iron (9–32 µmol/L) and Transferrin (2.0–4.0g/L) | _____<br>_____<br>_____                                                | _ _ _ / _ _ _ _                          | <input type="checkbox"/> |
| Creatinine (µmol/L) (pre-dialysis)                                                                                                                     | 300–1,500 µmol/L                                                                                                                                                                                                  | _____ µmol/L                                                           | _ _ _ / _ _ _ _                          | <input type="checkbox"/> |
| Urea (mmol/L) (pre-dialysis)                                                                                                                           | 15–40 mmol/L                                                                                                                                                                                                      | _____ mmol/L                                                           | _ _ _ / _ _ _ _                          | <input type="checkbox"/> |
| Urea (mmol/L) (post-dialysis)                                                                                                                          | 5–20 mmol/L                                                                                                                                                                                                       | _____ mmol/L                                                           | <i>Should be the same date as above.</i> | <input type="checkbox"/> |
| <input type="checkbox"/> Serum bicarbonate (mmol/L) (pre-dialysis) <b>OR</b><br><input type="checkbox"/> Serum CO <sub>2</sub> (mmol/L) (pre-dialysis) | 20–30 mmol/L                                                                                                                                                                                                      | _____ mmol/L                                                           | _ _ _ / _ _ _ _                          | <input type="checkbox"/> |
| Serum calcium (mmol/L) (pre-dialysis)                                                                                                                  | Various ranges—please specify:<br><input type="checkbox"/> 2.10–2.60 mmol/L uncorrected<br><input type="checkbox"/> 2.22–2.62 mmol/L corrected<br><input type="checkbox"/> 1.19–1.29 mmol/L ionized               | _____ mmol/L                                                           | _ _ _ / _ _ _ _                          | <input type="checkbox"/> |
| Serum phosphate (mmol/L) (pre-dialysis)                                                                                                                | 1.5–1.8 mmol/L                                                                                                                                                                                                    | _____ mmol/L                                                           | _ _ _ / _ _ _ _                          | <input type="checkbox"/> |
| Serum parathormone (PTH) (pmol/L; ng/L or pg/ml)                                                                                                       | Various ranges—please specify:<br><input type="checkbox"/> 1.3–7.6 pmol/L<br><input type="checkbox"/> 18–73 ng/L<br><input type="checkbox"/> 10–65 pg/ml                                                          | _____                                                                  | _ _ _ / _ _ _ _                          | <input type="checkbox"/> |
| HbA <sub>1c</sub> (if patient diabetic)                                                                                                                | 4%–12% (0.04–0.12)                                                                                                                                                                                                | _____ %                                                                | _ _ _ / _ _ _ _                          | <input type="checkbox"/> |
| Serum albumin (g/L)                                                                                                                                    | 25–50 g/L                                                                                                                                                                                                         | _____ g/L                                                              | _ _ _ / _ _ _ _                          | <input type="checkbox"/> |

2. Is the patient currently receiving erythropoietin? (If patient is temporarily on hold from erythropoietin on October 31 but typically receives it, check "Yes.")

No  Yes → If yes: Product used:  Eprex  Aranesp  Other: \_\_\_\_\_

Route of administration:  IV  Subcutaneously

Frequency of administration:  Weekly  Every two weeks  Every three weeks  Monthly  Other: \_\_\_\_\_

**Total dose within a 7-day period of administration:** \_\_\_\_\_

\* Will depend on laboratory procedures.

Patient Last Name: \_\_\_\_\_

**Iron Supplementation:**

3. a) Is the patient currently on iron?  
 No (1)     Yes → Specify:  Oral (2)     IV (3)     Both (IV and Oral) (4)  
 Intramuscular (IM) (5)     Other (6)
- b) Has the patient been on iron during the past three months?  
 No (1)     Yes → Specify:  Oral (2)     IV (3)     Both (IV and Oral) (4)  
 Intramuscular (IM) (5)     Other (6)  
 On dialysis less than three months (8)
- c) If the patient has been on dialysis for 12 months or more, has the patient been on iron during the past year?  
 No (1)     Yes → Specify:  Oral (2)     IV (3)     Both (IV and Oral) (4)  
 Intramuscular (IM) (5)     Other (6)  
 On dialysis less than one year (8)
4. a) Patient pre-dialysis weight (kg): \_\_\_\_\_  
Patient post-dialysis weight (kg): \_\_\_\_\_  
→ Date taken: \_\_\_\_\_ (DD/MON/YYYY)
- b) *For pediatric patients only (patients younger than 18):*  
Height (cm): \_\_\_\_\_  
→ Date taken: \_\_\_\_\_ (DD/MON/YYYY)
- Conversion factors: 1 lb = 0.454 kg; 1 inch = 2.54 cm*
5. a) Hemodialysis frequency (treatments per week): \_\_\_\_\_  
b) Number of hours per treatment: \_\_\_\_\_

6. Which access was the patient using on the date the laboratory results were obtained?
- Temporary catheter non-cuffed (1)
  - Temporary catheter cuffed (2)
  - Permanent catheter non-cuffed (3)
  - Permanent catheter cuffed (4)
  - Fistula (5) → How do you monitor the fistula function in this patient?
    - Not monitored
    - Total access blood flow (1) →  
Last flow (mL/min): \_\_\_\_\_  
Date: \_\_\_\_\_ (MON/YYYY)
    - Re-circulation (2) →  
Last re-circulation (%): \_\_\_\_\_  
Date: \_\_\_\_\_ (MON/YYYY)
  - Graft (6) → How do you monitor the graft function in this patient?
    - Not monitored
    - Total access blood flow (1) →  
Last flow (mL/min): \_\_\_\_\_  
Date: \_\_\_\_\_ (MON/YYYY)
    - Venous pressure (2) →  
Last dynamic venous pressure (mmHg) at a blood flow of 200 mL/min: \_\_\_\_\_  
Date: \_\_\_\_\_ (MON/YYYY)
7. Is the patient currently active on the renal transplant waiting list?  
 No     Yes     Unknown

**SEND THIS CONFIDENTIAL INFORMATION TO:**  
 Canadian Organ Replacement Register (CORR)  
 Canadian Institute for Health Information  
 4110 Yonge Street, Suite 300  
 Toronto, Ontario M2P 2B7  
 Phone: 416-481-2002

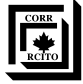

## Form 4: Follow-up Peritoneal Dialysis form

Please complete one follow-up form for every living hemodialysis patient being treated at your centre on October 31, 2014.  
 (Patient label may be attached if same information is provided.)

Hospital Name: \_\_\_\_\_

Patient Last Name: \_\_\_\_\_

Patient First and Middle Names: \_\_\_\_\_

Current Health Card Number: \_\_\_\_\_

Province of Health Card: \_\_\_\_\_

Current Postal Code: |\_|\_|\_|\_| |\_|\_|\_|\_|

Date of Birth: |\_|\_|/|\_|\_|/|\_|\_|\_|\_|\_| (DD/MON/YYYY)

Hospital City: \_\_\_\_\_

Hospital Number: \_\_\_\_\_

Affix patient label, if available.

1. Provide the details on the latest available laboratory results for this patient. Date cannot exceed December 31, 2014.

| Test                                                                                                                     | Reference Range*                                                                                                                                                                                                  | Laboratory Results                                                     | Date of Test (MON/YYYY) | Test Not Done            |
|--------------------------------------------------------------------------------------------------------------------------|-------------------------------------------------------------------------------------------------------------------------------------------------------------------------------------------------------------------|------------------------------------------------------------------------|-------------------------|--------------------------|
| Hemoglobin (g/L)                                                                                                         | 60–140 g/L                                                                                                                                                                                                        | _____ g/L                                                              | _ _ _ / _ _ _ _         | <input type="checkbox"/> |
| Ferritin (within nearest six months) (pmol/L or µg/L)                                                                    | 50–500 pmol/L<br>Males 14–610 µg/L<br>Females 8–125 µg/L                                                                                                                                                          | _____<br><input type="checkbox"/> pmol/L <input type="checkbox"/> µg/L | _ _ _ / _ _ _ _         | <input type="checkbox"/> |
| Iron profile (for example, % saturation, serum iron, transferrin, TIBC)                                                  | <input type="checkbox"/> Iron saturation (25%–50%)<br><input type="checkbox"/> Serum iron (9–32 µmol/L) and TIBC (45–81 µmol/L)<br><input type="checkbox"/> Serum iron (9–32 µmol/L) and Transferrin (2–0–4.0g/L) | _____<br>_____<br>_____                                                | _ _ _ / _ _ _ _         | <input type="checkbox"/> |
| Creatinine (µmol/L)                                                                                                      | 300–1,500 µmol/L                                                                                                                                                                                                  | _____ µmol/L                                                           | _ _ _ / _ _ _ _         | <input type="checkbox"/> |
| Urea (mmol/L)                                                                                                            | 15–40 mmol/L                                                                                                                                                                                                      | _____ mmol/L                                                           | _ _ _ / _ _ _ _         | <input type="checkbox"/> |
| <input type="checkbox"/> Serum bicarbonate (mmol/L) <b>OR</b><br><input type="checkbox"/> Serum CO <sub>2</sub> (mmol/L) | 20–30 mmol/L                                                                                                                                                                                                      | _____ mmol/L                                                           | _ _ _ / _ _ _ _         | <input type="checkbox"/> |
| Serum calcium (mmol/L)                                                                                                   | Various ranges—please specify:<br><input type="checkbox"/> 2.10–2.60 mmol/L uncorrected<br><input type="checkbox"/> 2.22–2.62 mmol/L corrected<br><input type="checkbox"/> 1.19–1.29 mmol/L ionized               | _____ mmol/L                                                           | _ _ _ / _ _ _ _         | <input type="checkbox"/> |
| Serum phosphate (mmol/L)                                                                                                 | 1.5–1.8 mmol/L                                                                                                                                                                                                    | _____ mmol/L                                                           | _ _ _ / _ _ _ _         | <input type="checkbox"/> |
| Serum parathormone (PTH) (pmol/L; ng/L or pg/ml)                                                                         | Various ranges—please specify:<br><input type="checkbox"/> 1.3–7.6 pmol/L<br><input type="checkbox"/> 18–73 ng/L<br><input type="checkbox"/> 10–65 pg/ml                                                          | _____                                                                  | _ _ _ / _ _ _ _         | <input type="checkbox"/> |
| HbA <sub>1c</sub> (if patient diabetic)                                                                                  | 4%–12% (0.04–0.12)                                                                                                                                                                                                | _____ %                                                                | _ _ _ / _ _ _ _         | <input type="checkbox"/> |
| Serum albumin (g/L)                                                                                                      | 25–50 g/L                                                                                                                                                                                                         | _____ g/L                                                              | _ _ _ / _ _ _ _         | <input type="checkbox"/> |

2. Is the patient currently receiving erythropoietin? (If patient is temporarily on hold from erythropoietin on October 31 but typically receives it, check "Yes.")

No  Yes → If yes: Product used:  Eprex  Aranesp  Other: \_\_\_\_\_  
 Route of administration:  IV  Subcutaneously  
 Frequency of administration:  Weekly  Every two weeks  Every three weeks  Monthly  Other: \_\_\_\_\_  
 Total dose within a 7-day period of administration: \_\_\_\_\_

\* Will depend on laboratory procedures.





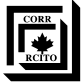

# Form 5: Facility Profile Hemodialysis form

Complete this form to reflect the situation at your facility on December 31, 2010. Please keep a copy for your records.

Hospital Name: \_\_\_\_\_

Hospital City: \_\_\_\_\_

## SECTION A—FACILITY RESOURCES

Hospital Number : \_\_\_\_\_

1. Does your facility re-use dialysers?

No     Yes → What type of system is used?

Manual (M)     Automated (A)

    → What number patients were on re-used dialysers on December 31, 2010? \_\_\_\_\_

    → What method is used for sterilizing re-used dialysers? *(Please check one.)*

Heat (H)

Formaldehyde (F)

Renalin (R)

Glutaraldehyde (G)

Other chemical (specify) (O) \_\_\_\_\_

2. a) What is the total number of haemodialysis stations at your facility?

    \_\_\_\_\_  
*(Note: This does not include stations at community centres.)*

b) On page 3 of this questionnaire, please list all the community centres affiliated with your facility and the number of stations at each centre.

3. Is continuous renal replacement therapy (CRRT) used?

No (0)     Yes → Who is responsible for CRRT?

Nephrologist only (1)     Intensivist only (2)

Nephrologist/Intensivist share care (3)

4. a) How many haemodialysis patients are being dialysed using the following accesses? *(Please report the number of patients.)*

|                                           | At Hospital | At Home | At Community Centre |
|-------------------------------------------|-------------|---------|---------------------|
| Natural vein fistula                      | _____       | _____   | _____               |
| Synthetic arteriovenous graft (PTFE)      | _____       | _____   | _____               |
| Saphenous vein graft                      | _____       | _____   | _____               |
| Permanent central venous catheters        | _____       | _____   | _____               |
| Temporary subclavian vein catheters       | _____       | _____   | _____               |
| Temporary internal jugular vein catheters | _____       | _____   | _____               |
| Temporary femoral vein catheters          | _____       | _____   | _____               |
| Other (specify) _____                     | _____       | _____   | _____               |

4. b) How many haemodialysis patients are on more than one access on December 31, 2010? \_\_\_\_\_

5. a) Does your facility provide dialysis facilities to temporary visitors (including holidays)?

No     Yes

b) Is your facility always able to provide dialysis facilities to temporary visitors?

No     Yes

6. a) Does your facility have adequate haemodialysis facilities (e.g., in terms of space/physical capacity, human resources)?

No → If not, select the **top 2** reasons why facilities are inadequate:     Yes

inadequate space for patients (1)

inadequate space for machines (2)

inadequate space for training facilities (3)

lack of physical capacity to expand (4)

lack of qualified registered nurses(5)

lack of dieticians, social workers, pharmacists or other allied health professionals (6)

lack of technicians/technologists (7)

lack of dedicated nephrologist(s) (8)

other—please specify : \_\_\_\_\_(9)

b) Do staff and patients have free choices as to which modality is selected?

No → If not, select the **top 2** reasons why patients do not have free choice:     Yes

other modality not supported at centre (1)

space restrictions limit options (2)

geographic access to centre by patients limits options (3)

other—please specify : \_\_\_\_\_(9)

Hospital Name: \_\_\_\_\_

**SECTION B—TREATMENT AVAILABLE**

7. a) What types of haemodialysis treatment are supported by your facility? (Please check all that apply.)

|                   | Acute Care Hospital      |                          |                          | Community Centre         |                          |                          | Chronic Care Hospital    | Home                     |
|-------------------|--------------------------|--------------------------|--------------------------|--------------------------|--------------------------|--------------------------|--------------------------|--------------------------|
|                   | Total Care               | Limited Self Care        | Total Self Care          | Total Care               | Limited Self Care        | Total Self Care          | Total Care               | Total Self Care          |
| Conventional HD   | <input type="checkbox"/> | <input type="checkbox"/> | <input type="checkbox"/> | <input type="checkbox"/> | <input type="checkbox"/> | <input type="checkbox"/> | <input type="checkbox"/> | <input type="checkbox"/> |
| Short Daily HD    | <input type="checkbox"/> | <input type="checkbox"/> | <input type="checkbox"/> | <input type="checkbox"/> | <input type="checkbox"/> | <input type="checkbox"/> | <input type="checkbox"/> | <input type="checkbox"/> |
| Slow Nocturnal HD | <input type="checkbox"/> | <input type="checkbox"/> | <input type="checkbox"/> | <input type="checkbox"/> | <input type="checkbox"/> | <input type="checkbox"/> | <input type="checkbox"/> | <input type="checkbox"/> |

b) Please indicate the number of patients on each form of treatment as of December 31, 2010

|                   | Acute Care Hospital |                   |                 | Community Centre |                   |                 | Chronic Care Hospital | Home            |
|-------------------|---------------------|-------------------|-----------------|------------------|-------------------|-----------------|-----------------------|-----------------|
|                   | Total Care          | Limited Self Care | Total Self Care | Total Care       | Limited Self Care | Total Self Care | Total Care            | Total Self Care |
| Conventional HD   | _____               | _____             | _____           | _____            | _____             | _____           | _____                 | _____           |
| Short Daily HD    | _____               | _____             | _____           | _____            | _____             | _____           | _____                 | _____           |
| Slow Nocturnal HD | _____               | _____             | _____           | _____            | _____             | _____           | _____                 | _____           |

**SECTION C—ADEQUACY/CLEARANCE**

8. a) Is urea kinetic modelling used to monitor haemodialysis prescription?

No  Yes → What percentage of patients are routinely monitored?

- 0–49% of patients (0)
- 50–75% of patients (1)
- 76–100% of patients (2)

→ What is the target Kt/V or percent reduction in the urea (PRU)?

- |                                                    |                                           |
|----------------------------------------------------|-------------------------------------------|
| <u>Kt/V</u>                                        | <u>PRU</u>                                |
| <input type="checkbox"/> 1.2 to 1.4 (0)            | <input type="checkbox"/> 0 to 64% (0)     |
| <input type="checkbox"/> Over 1.4 (1)              | <input type="checkbox"/> 65 to 69% (1)    |
| <input type="checkbox"/> Other (specify) _____ (2) | <input type="checkbox"/> 70 to 74% (2)    |
|                                                    | <input type="checkbox"/> 75% and over (3) |

→ How frequently is urea kinetic modelling used per haemodialysis patient? (Please approximate by location.)

|                       | (0)                      | (1)                      | (2)                      | (3)                      | (4)                      |
|-----------------------|--------------------------|--------------------------|--------------------------|--------------------------|--------------------------|
|                       | Once per mo.             | Once every 3 mos.        | Once every 6 mos.        | Once every 12 mos.       | Other                    |
| Acute Care Hospital   | <input type="checkbox"/> | <input type="checkbox"/> | <input type="checkbox"/> | <input type="checkbox"/> | <input type="checkbox"/> |
| Community Centre      | <input type="checkbox"/> | <input type="checkbox"/> | <input type="checkbox"/> | <input type="checkbox"/> | <input type="checkbox"/> |
| Chronic Care Hospital | <input type="checkbox"/> | <input type="checkbox"/> | <input type="checkbox"/> | <input type="checkbox"/> | <input type="checkbox"/> |
| Home                  | <input type="checkbox"/> | <input type="checkbox"/> | <input type="checkbox"/> | <input type="checkbox"/> | <input type="checkbox"/> |

**SECTION D—NURSING HOME/CHRONIC CARE**

9. How many haemodialysis patients reside or are awaiting placement in a nursing home or chronic care facility?

- # patients residing in a nursing home \_\_\_\_\_
- # patients awaiting placement in a nursing home \_\_\_\_\_
- # patients residing in a chronic care facility \_\_\_\_\_
- # patients awaiting placement in a chronic care facility \_\_\_\_\_

*Nursing home: A facility where residents require personal care assistance and/or assistance with activities of daily living.*

*Chronic Care Facility: A facility where, due to the health needs of residents, ongoing medical intervention is provided.*

10. Does your facility have a home haemodialysis training program?

No  Yes → How many home patients were trained for home haemo during the year 2010? \_\_\_\_\_

→ Do you have dedicated home training station(s)?

No  Yes → How many? \_\_\_\_\_

11. How many home haemodialysis patients are assisted with their dialysis by a paid assistant? \_\_\_\_\_

12. How many haemodialysis patients were receiving erythropoietin on December 31, 2010?

\_\_\_\_\_ Eprex \_\_\_\_\_ Aranesp \_\_\_\_\_ Other—please specify: \_\_\_\_\_

13. How many haemodialysis patients were receiving growth hormone on December 31, 2010? (For paediatric patients only.) \_\_\_\_\_

**SECTION E—SCREENING**

14. Does your facility screen new haemodialysis patients for:

- Hepatitis B?  No  Yes
- Hepatitis C?  No  Yes

15. Are haemodialysis patients routinely vaccinated against Hepatitis B?

No  Yes

16. Does your facility have an isolation room for patients who require isolation?

No  Yes

17. a) Which of the following best describes the policy of your facility regarding HIV antibodies (HTLV-III/LAV) among haemodialysis patients with end-stage renal disease? (Please check all that apply.)

- All patients are tested
- New patients are tested
- Only patients with specific indications are tested
- No patients are tested

b) How many haemodialysis patients in your program were HIV positive in 2010? \_\_\_\_\_

c) How many haemodialysis patients in your program died due to AIDS in 2010? \_\_\_\_\_

Hospital Name: \_\_\_\_\_

**List of Community Centres** (See question 2b on page 1.)

| Community Centre Name/Satellite Unit Name | Location | # of Stations |
|-------------------------------------------|----------|---------------|
| (1) _____                                 | _____    | _____         |
| (2) _____                                 | _____    | _____         |
| (3) _____                                 | _____    | _____         |
| (4) _____                                 | _____    | _____         |
| (5) _____                                 | _____    | _____         |
| (6) _____                                 | _____    | _____         |
| (7) _____                                 | _____    | _____         |
| (8) _____                                 | _____    | _____         |
| (9) _____                                 | _____    | _____         |
| (10) _____                                | _____    | _____         |
| (11) _____                                | _____    | _____         |
| (12) _____                                | _____    | _____         |
| (13) _____                                | _____    | _____         |
| (14) _____                                | _____    | _____         |
| (15) _____                                | _____    | _____         |
| (16) _____                                | _____    | _____         |
| (17) _____                                | _____    | _____         |
| (18) _____                                | _____    | _____         |
| (19) _____                                | _____    | _____         |
| (20) _____                                | _____    | _____         |

Completed by: \_\_\_\_\_ Date: \_\_\_\_\_

Print Name: \_\_\_\_\_ Tel.: \_\_\_\_\_

Fax: \_\_\_\_\_ Email: \_\_\_\_\_

Name of contact person (if different from above): \_\_\_\_\_

Tel.: \_\_\_\_\_ Fax: \_\_\_\_\_

Email: \_\_\_\_\_

In which language would you prefer to receive feedback?  English  French

***Thank you for completing this questionnaire. Please take a few moments to ensure that all the questions are answered.***

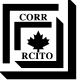

# Form 6: Facility Profile Peritoneal Dialysis form

Complete this form to reflect the situation at your facility on December 31, 2010. Please keep a copy for your records.

Hospital Name: \_\_\_\_\_

Hospital City: \_\_\_\_\_

Hospital Number: \_\_\_\_\_

## SECTION A—FACILITY RESOURCES

1. a) Does your facility have adequate peritoneal dialysis facilities (e.g., in terms of space/physical capacity, human resources)?

No → If not, select the **top 2** reasons why facilities are inadequate.  Yes

- inadequate space for patients (1)
- inadequate space for machines (2)
- inadequate space for training facilities (3)
- lack of physical capacity to expand (4)
- lack of qualified registered nurses (5)
- lack of dieticians, social workers, pharmacists or other allied health professionals (6)
- lack of technicians/technologist(s) (7)
- lack of dedicated nephrologist(s) (8)
- other—please specify: \_\_\_\_\_ (9)

b) Do staff and patients have free choices as to which modality is selected?

No → If not select the **2 top** reasons why patients do not have free choices  Yes

- other modality not supported at centre (1)
- space restrictions limit options (2)
- geographic access to centre by patients limits options (3)
- other—please specify: \_\_\_\_\_ (9)

## SECTION B—TREATMENT AVAILABLE

2. a) What types of peritoneal dialysis treatment are supported by your facility? (Please check all that apply.)

|                                | Acute Care Hospital      |                          | Chronic care Hospital    |                          | Home                     |
|--------------------------------|--------------------------|--------------------------|--------------------------|--------------------------|--------------------------|
| PD combined with haemodialysis | <input type="checkbox"/> |                          |                          |                          |                          |
| CAPD (Continuous Ambulatory)   | <input type="checkbox"/> | <input type="checkbox"/> | <input type="checkbox"/> | <input type="checkbox"/> | <input type="checkbox"/> |
| APD (Automated PD)             | <input type="checkbox"/> | <input type="checkbox"/> | <input type="checkbox"/> | <input type="checkbox"/> | <input type="checkbox"/> |

b) Please indicate the number of patients on each form of treatment as of December 31, 2010.

|                                | Acute Care Hospital |              | Chronic care Hospital |              | Home  |
|--------------------------------|---------------------|--------------|-----------------------|--------------|-------|
|                                | Total Care          | Limited Care | Total Care            | Limited Care |       |
| PD combined with haemodialysis | _____               |              |                       |              |       |
| CAPD (Continuous Ambulatory)   | _____               | _____        | _____                 | _____        | _____ |
| APD (Automated PD)             | _____               | _____        | _____                 | _____        | _____ |

## SECTION C—ADEQUACY/CLEARANCE

3. a) Are Peritoneal Equilibration Tests (PETs) done on PD patients?

No  Yes → What proportion of patients have a PET within three months of initiating PD?

- < 25% of patients (0)
- 25–50% of patients (1)
- 51–75% of patients (2)
- 76–100% of patients (3)

b) Are adequacy/clearance measurements done on PD patients?

No  Yes → What proportion of PD patients have Kt/V urea or creatinine clearance done at least once a year?

- < 25% of patients (0)
- 25–50% of patients (1)
- 51–75% of patients (2)
- 76–100% of patients (3)

→ Which of the following are routinely done and how many times during the year are they usually done?

24-hr dialysate creatinine clearance

No  Yes → # times per year: \_\_\_\_\_

24-hr urinary creatinine clearance

No  Yes → # times per year: \_\_\_\_\_

24-hr dialysate Kt/V urea

No  Yes → # times per year: \_\_\_\_\_

24-hr urinary Kt/V urea

No  Yes → # times per year: \_\_\_\_\_

c) Is this information used within a computer modeling program to validate the initial (i.e., within three months) peritoneal dialysis prescription?

No  Yes → What program? (specify) \_\_\_\_\_

**SECTION D—NURSING HOME/CHRONIC CARE**

4. How many peritoneal dialysis patients reside or are awaiting placement in a nursing home or chronic care facility?

# patients residing in a nursing home \_\_\_\_\_  
# patients awaiting placement in a nursing home \_\_\_\_\_  
# patients residing in a chronic care facility \_\_\_\_\_  
# patients awaiting placement in a chronic care facility \_\_\_\_\_

*Nursing home: A facility where residents require personal care assistance and/or assistance with activities of daily living.*  
*Chronic Care Facility: A facility where, due to the health needs of residents, ongoing medical intervention is provided.*

5. Does your facility have a home PD training program?

No     Yes    → How many home patients were trained for home peritoneal dialysis during the year 2010? \_\_\_\_\_

6. How many PD patients were receiving erythropoietin on December 31, 2010?

\_\_\_\_\_ Eprex    \_\_\_\_\_ Aranesp    \_\_\_\_\_ Other—please specify:

7. How many PD patients were receiving growth hormone on December 31, 2010? (For paediatric patients only.) \_\_\_\_\_

Completed by: \_\_\_\_\_

Date: \_\_\_\_\_

Print Name: \_\_\_\_\_

Telephone: \_\_\_\_\_

Fax: \_\_\_\_\_

Email: \_\_\_\_\_

Name of contact person (if different from above): \_\_\_\_\_

Telephone: \_\_\_\_\_

Fax: \_\_\_\_\_

Email: \_\_\_\_\_

In which language would you prefer to receive feedback?

English     French

**SECTION E—SCREENING**

8. Does your facility screen new PD patients for:

Hepatitis B?     No     Yes  
Hepatitis C?     No     Yes

9. Are PD patients routinely vaccinated against Hepatitis B?

No     Yes

10. Does your facility have an isolation room for patients who require isolation?

No     Yes

11. a) Which of the following best describes the policy of your facility regarding testing of HIV antibodies (HTLV-III/LAV) among PD patients with end-stage renal disease?  
(Please check all that apply.)

All patients are tested  
 New patients are tested  
 Only patients with specific indications are tested  
 No patients are tested

b) How many PD patients on dialysis in your program were HIV-positive in 2010? \_\_\_\_\_

c) How many PD patients in your program died due to AIDS in 2010? \_\_\_\_\_

***Thank you for completing this questionnaire. Please take a few moments to ensure that all the questions are answered.***
